# Supplementary material for: Mechanistic insights into the adsorption of different types of VOCs on monolayer MoS2via first-principles approaches
Source: Royal Society of Chemistry journal article supplement (doi:10.1039/d4en00953c), 2024-12-20
Supplement: d4en00953c1.pdf [file d4en00953c1.pdf]

## Supporting Information (SI):

### Mechanistic insights into different types of typical VOC adsorption on monolayer MoS<sub>2</sub> via first-principles approaches

Weina Zhao,<sup>a,b</sup> Jinlong Wang,<sup>a,b</sup> Chang Shen,<sup>a,b</sup> Bufan Xie,<sup>a,b</sup> Guiying Li <sup>a,b</sup>

and Taicheng An <sup>\*a,b</sup>

<sup>a</sup> *Guangdong Key Laboratory of Environmental Catalysis and Health Risk Control, Guangdong Hong Kong-Macao Joint Laboratory for Contaminants Exposure and Health, Institute of Environmental Health and Pollution Control, Guangdong University of Technology, Guangzhou 510006, China*

<sup>b</sup> *Guangdong Engineering Technology Research Center for Photocatalytic Technology Integration and Equipment, Guangzhou Key Laboratory of Environmental Catalysis and Pollution Control, School of Environmental Science and Engineering, Guangdong University of Technology, Guangzhou 510006, China*

**\*Corresponding Author: Prof. Taicheng An, E-mail: [antc99@gdut.edu.cn](mailto:antc99@gdut.edu.cn)**

## Table of contents

**Fig. S1.** Top (a) and side (b) view of the optimized bulk geometries of 2H MoS<sub>2</sub>.

**Fig. S2.** The total (Total, black curve) and the projected density of states (PDOSs) of the pristine monolayer MoS<sub>2</sub>. The Fermi level is set to zero.

**Fig. S3.** Optimized structures of thermodynamically preferred models for carboxylic acid with different carbon chain on monolayer MoS<sub>2</sub>.

**Table S1.** Calculated adsorption energy of eight types of VOC molecules (alkanes, aromatic hydrocarbon, alkynes, aldehydes, ketones, alkenes, alcohols and carboxylic acids) on the monolayer MoS<sub>2</sub>.

**Table S2.** The distance of VOCs with varying carbon chain lengths to the MoS<sub>2</sub> surface.

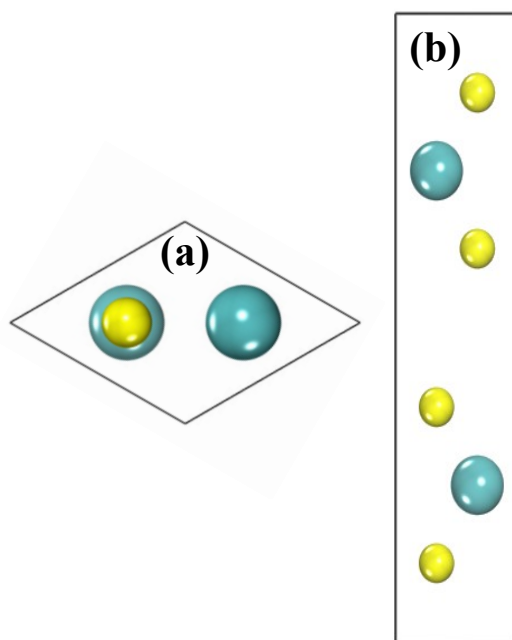

**Fig. S1.** Top (a) and side (b) view of the optimized bulk geometries of 2H MoS<sub>2</sub>.

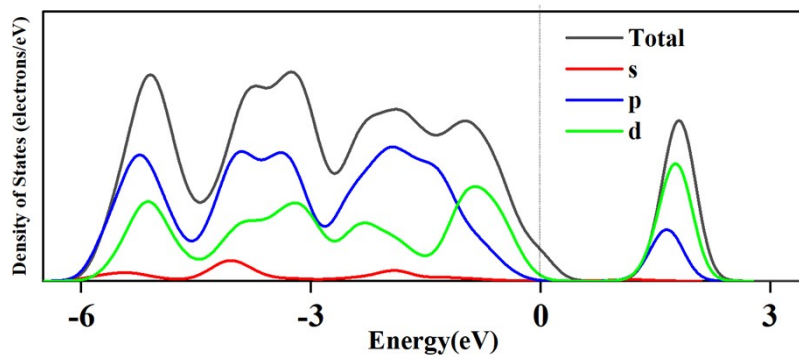

**Fig. S2.** The total (Total, black curve) and the projected density of states (PDOSs) of the pristine monolayer MoS<sub>2</sub>. The Fermi level is set to zero.

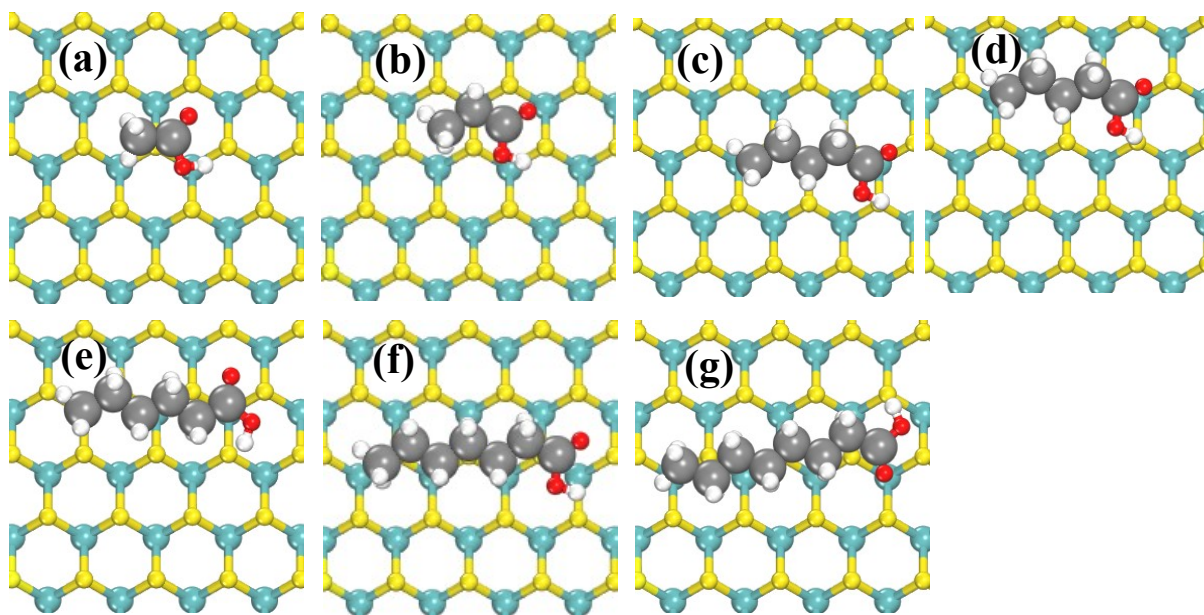

**Fig. S3.** Optimized structures of thermodynamically preferred models for carboxylic acid with different carbon chain on monolayer MoS<sub>2</sub>.

**Table S1.** Calculated adsorption energy of eight types of VOC molecules (alkanes, aromatic hydrocarbon, alkynes, aldehydes, ketones, alkenes, alcohols and carboxylic acids) on the monolayer MoS<sub>2</sub>.

| Types                       | Adsorption Energy(eV) |       |       |       |       |       |       |       |
|-----------------------------|-----------------------|-------|-------|-------|-------|-------|-------|-------|
|                             | Number of C atoms     |       |       |       |       |       |       |       |
|                             | 1                     | 2     | 3     | 4     | 5     | 6     | 7     | 8     |
| <b>Alkane</b>               | -                     | -0.34 | -0.49 | -0.62 | -0.76 | -0.88 | -0.98 | -1.14 |
| <b>aromatic hydrocarbon</b> | -                     | -     | -     | -     | -     | -0.82 | -0.99 | -1.07 |
| <b>Alkyne</b>               | -                     | -0.32 | -0.46 | -0.59 | -0.73 | -0.86 | -1.10 | -1.07 |
| <b>Aldehydes</b>            | -0.25                 | -0.37 | -0.49 | -0.64 | -0.71 | -0.91 | -1.03 | -1.16 |
| <b>Ketone</b>               | -                     | -     | -0.54 | -0.65 | -0.80 | -0.91 | -1.03 | -1.18 |
| <b>Alkene</b>               | -                     | -0.37 | -0.50 | -0.58 | -0.67 | -0.91 | -1.04 | -1.18 |
| <b>Alcohols</b>             | -0.32                 | -0.44 | -0.57 | -0.65 | -0.77 | -0.96 | -1.07 | -1.12 |
| <b>carboxylic acid</b>      | -                     | -0.44 | -0.57 | -0.73 | -0.78 | -0.96 | -1.08 | -1.19 |

**Table S2.** The distance of VOCs with varying carbon chain lengths to the MoS<sub>2</sub> surface.

| Types                                                           | $d^{\#}$ (Å) | $d^*$ (Å) |
|-----------------------------------------------------------------|--------------|-----------|
| <b>CH<sub>3</sub>CH<sub>3</sub></b>                             | 3.42         | 3.41      |
| <b>CH<sub>3</sub>CH<sub>2</sub>CH<sub>3</sub></b>               | 3.39         | 3.39      |
| <b>CH<sub>3</sub>(CH<sub>2</sub>)<sub>2</sub>CH<sub>3</sub></b> | 3.40         | 3.24      |
| <b>CH<sub>3</sub>(CH<sub>2</sub>)<sub>3</sub>CH<sub>3</sub></b> | 3.39         | 3.43      |
| <b>CH<sub>3</sub>(CH<sub>2</sub>)<sub>4</sub>CH<sub>3</sub></b> | 3.44         | 3.41      |
| <b>CH<sub>3</sub>(CH<sub>2</sub>)<sub>5</sub>CH<sub>3</sub></b> | 3.47         | 3.48      |
| <b>CH<sub>3</sub>(CH<sub>2</sub>)<sub>6</sub>CH<sub>3</sub></b> | 3.45         | 3.49      |

$d^{\#}$  : the average distance of VOCs to the MoS<sub>2</sub> surface.

$d^*$  : the distance from the center of VOCs to the MoS<sub>2</sub> surface.
